# Supplementary material for: Comparison of a ready-to-use liquid glucagon injection administered by autoinjector to glucagon emergency kit for the symptomatic relief of severe hypoglycemia: two randomized crossover non-inferiority studies
Source: PubMed Central journal article supplement — BMJ Open Diabetes Res Care. 2021 Oct 7;9(1):e002137. doi: 10.1136/bmjdrc-2021-002137 (PMC8499286; doi:10.1136/bmjdrc-2021-002137), 2021-10-07

## Supplemental Figure 1. Hypoglycemia Induction Study Procedure

See PDF document

## Supplemental Figure 1. Hypoglycemia Induction Study Procedure

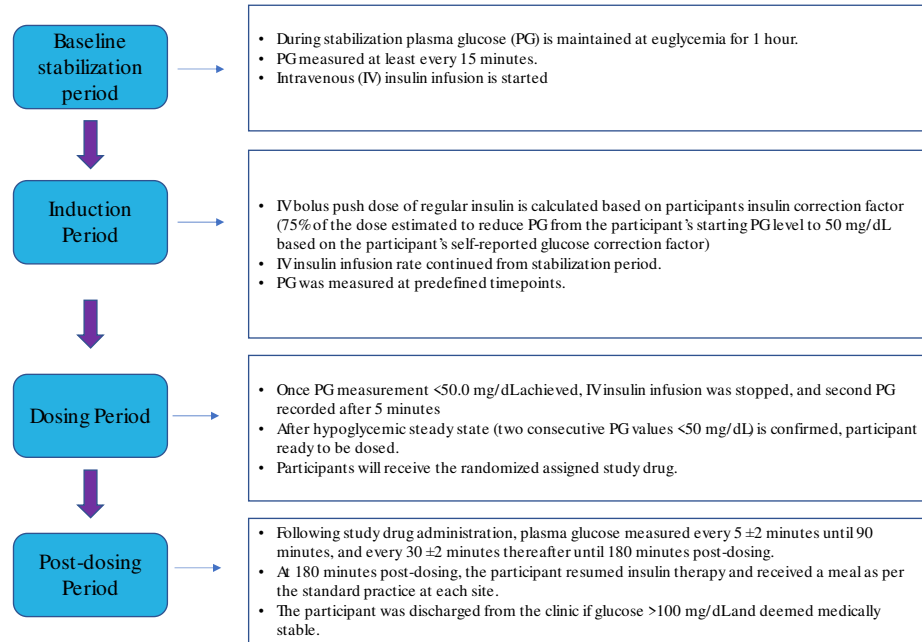

Supplemental Table 1. Analysis of Plasma Glucose Parameters After Receiving Glucagon by Study and Treatment

| Parameter                             | Statistic                                     | XSGP-301 <sup>a</sup> |                                          | XSGP-303 <sup>a</sup> |                                                                      |
|---------------------------------------|-----------------------------------------------|-----------------------|------------------------------------------|-----------------------|----------------------------------------------------------------------|
|                                       |                                               | GAI 1 mg (N=78)       | GEK 1mg (N=79)                           | GAI 1 mg (N=76)       | GEK 1 mg (N=78)                                                      |
| <b>C<sub>max</sub></b> (mg/dL)        | n                                             | 78                    | 79                                       | 76                    | 78                                                                   |
|                                       | Mean ± SD                                     | 202.73 ± 41.796       | 193.49 ± 42.247                          | 238.32 ± 45.626       | 228.11 ± 46.567                                                      |
|                                       | Range                                         | 111.0 – 304.5         | 102.0 – 303.5                            | 130.0 – 321.5         | 138.5 – 327.0                                                        |
|                                       | LS Mean Difference ± SE (95% CI) <sup>b</sup> |                       | 9.93 ± 4.923<br>(0.125, 19.741)          |                       | 10.99 ± 4.119<br>(4.135, 17.849)                                     |
|                                       | p-value                                       |                       | 0.047                                    |                       | 0.009                                                                |
| <b>T<sub>max</sub></b> (min)          | n                                             | 78                    | 79                                       | 76                    | 78                                                                   |
|                                       | Mean ± SD                                     | 111.27 ± 33.507       | 100.44 ± 42.722                          | 125.67 ± 33.513       | 113.89 ± 31.908                                                      |
|                                       | Range                                         | 60.0 – 240.0          | 45.0 – 240.0                             | 59.9 – 181.5          | 54.2 – 181.2                                                         |
|                                       | LS Mean Difference ± SE (95% CI) <sup>b</sup> |                       | 9.62 ± 4.803<br>(0.049, 19.184)          |                       | NA <sup>c</sup>                                                      |
|                                       | p-value                                       |                       | 0.049                                    |                       | Period 1:<br>0.3722 <sup>c</sup><br>Period 2:<br>0.0570 <sup>c</sup> |
| <b>AUC<sub>0-90</sub></b> (mg*min/dL) | n                                             | 78                    | 79                                       | 76                    | 78                                                                   |
|                                       | Mean ± SD                                     | 11651.37 ± 2406.856   | 12260.36 ± 2134.170                      | 13312.63 ± 1986.227   | 13950.81 ± 2093.808                                                  |
|                                       | Range                                         | 5263.9 – 18378.0      | 7089.5 – 16761.3                         | 8478.4 – 18705.4      | 9987.4 – 18762.5                                                     |
|                                       | LS Mean Difference ± SE (95% CI) <sup>b</sup> |                       | -545.17 ± 226.863<br>(-997.107, -93.237) |                       | -615.59 ± 192.370<br>(-935.864, -295.317)                            |
|                                       | p-value                                       |                       | 0.019                                    |                       | 0.002                                                                |

GAI = Glucagon Auto-Injector; GEK = Glucagon Emergency Kit

<sup>a</sup> Analysis is conducted for all randomized subjects based on actual treatment received. XSGP-301 statistics are based on Modified Intent-to-Treat Population. XSGP-303 statistics are based on Intent-to-Treat Population.

<sup>b</sup> Mixed Model was applied to compare difference in treatment groups accounting for period and sequence as covariates

<sup>c</sup> Non Normality was observed, and log transformation did not resolve. A non-parametric Kruskal-Wallis Test was applied excluding other covariates and conducted for each of the treatment periods separately.

Supplemental Table 2: Non-inferiority Analysis of Failure Scores by Study and Analysis Population

| Outcome:                                                                                                                                                        | Statistic                           | XSGP-301       |                 |                 | XSGP-303       |               |
|-----------------------------------------------------------------------------------------------------------------------------------------------------------------|-------------------------------------|----------------|-----------------|-----------------|----------------|---------------|
|                                                                                                                                                                 |                                     | ITT Population | PrPP Population | RePP Population | ITT Population | PP Population |
| Composite Endpoint:<br>Failure to achieve a Plasma Glucose > 70 mg/dL or an increase in Plasma Glucose by ≥ 20 mg/dL within 30 minutes After Receiving Glucagon | N                                   | 80             | 80              | 80              | 81             | 73            |
|                                                                                                                                                                 | Dht                                 | 0.029          | 0.039           | 0.030           | 0.009          | 0.000         |
|                                                                                                                                                                 | SE                                  | 0.018          | 0.019           | 0.018           | 0.005          | 0.000         |
|                                                                                                                                                                 | Dht + Confidence Bound <sup>a</sup> | 0.075          | 0.087           | 0.077           | 0.022          | 0.000         |
|                                                                                                                                                                 |                                     |                |                 |                 |                |               |

N = Number of patients for analysis type

Dht = For each Subject, derived score is the difference in failure scores between treatment and control.

ITT = Intent-to-Treat Population all subjects randomized.

PrPP = Pre-Specified Per Protocol Population, for XSGP-301 includes observations in the ITT Population where observations were set to missing for visits where a major protocol violation occurred based on pre-specified criteria for major violation and analyzed by actual treatment received.

RePP = Revised Per Protocol Population, for XSGP-301 includes observations in the mITT Population where observations were set to missing for visits where a major protocol violation occurred based on revised criteria for major violation and analyzed by actual treatment received.

PP = Per Protocol Population, for XSGP-303 were all randomized subjects who, during both study periods, successfully completed the insulin induction procedure, fulfill the criteria for having achieved a hypoglycemic steady state, and successfully receive a dose of both study drugs.

<sup>a</sup> One-sided 95% confidence was 2.6 \* SE for XSGP-301 and 2.8 \* SE for XSGP-303.

Supplemental Figure 2: Subject Disposition XSGP-301

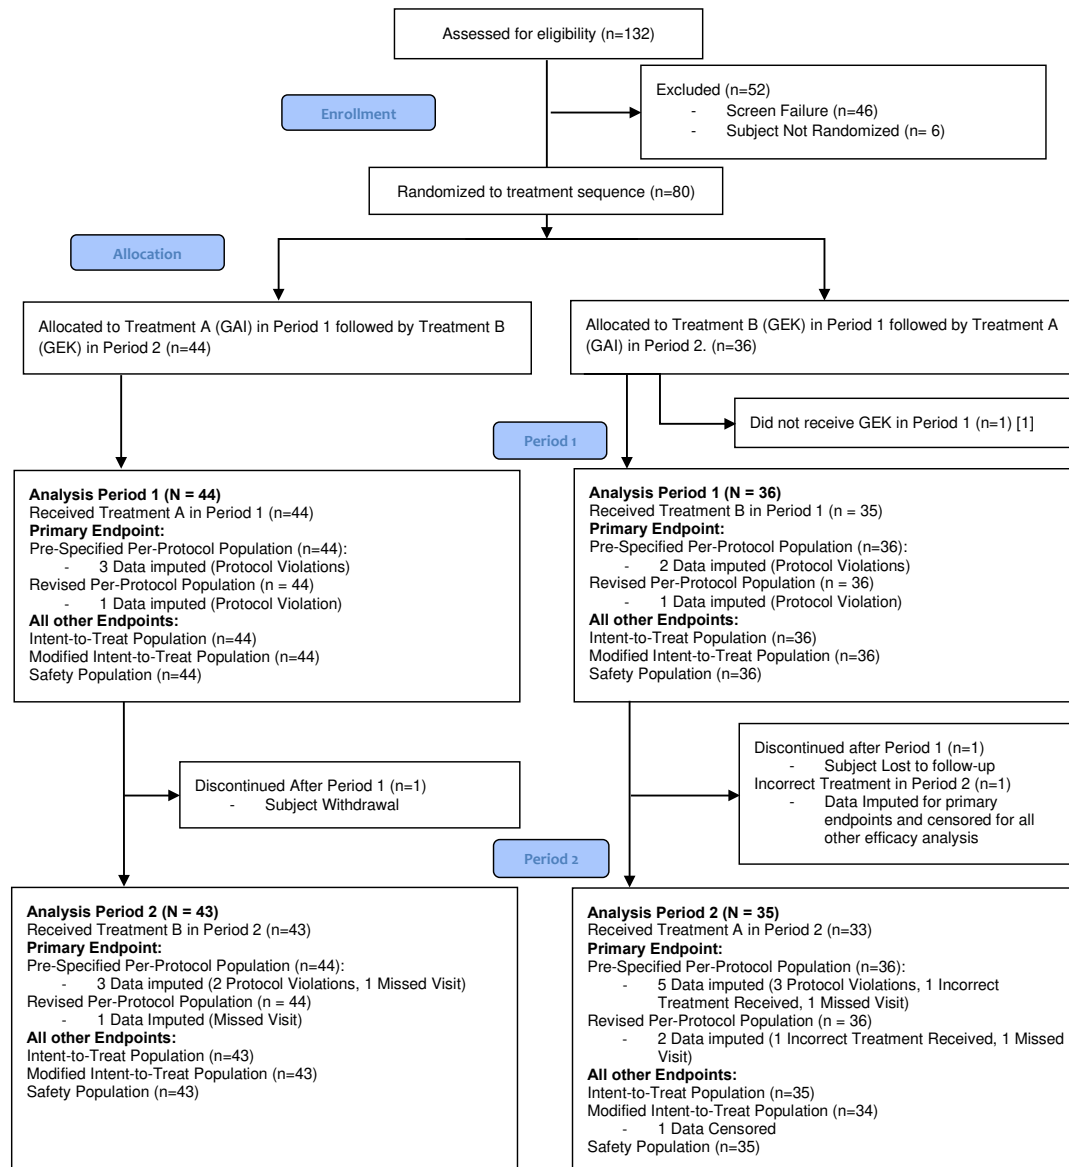

GAI = Glucagon Auto-Injector  
 GEK = Glucagon Emergency Kit

[1] One Subject received treatments in reverse order than their planned treatment sequence (Planned: BA; Actual: AB). This subject was included in all Analysis populations and analyzed according to actual treatment received in the Safety, Modified-Intent-to-Treat, and Per Protocol Populations.

Supplemental Figure 3: Subject Disposition XSGP-303

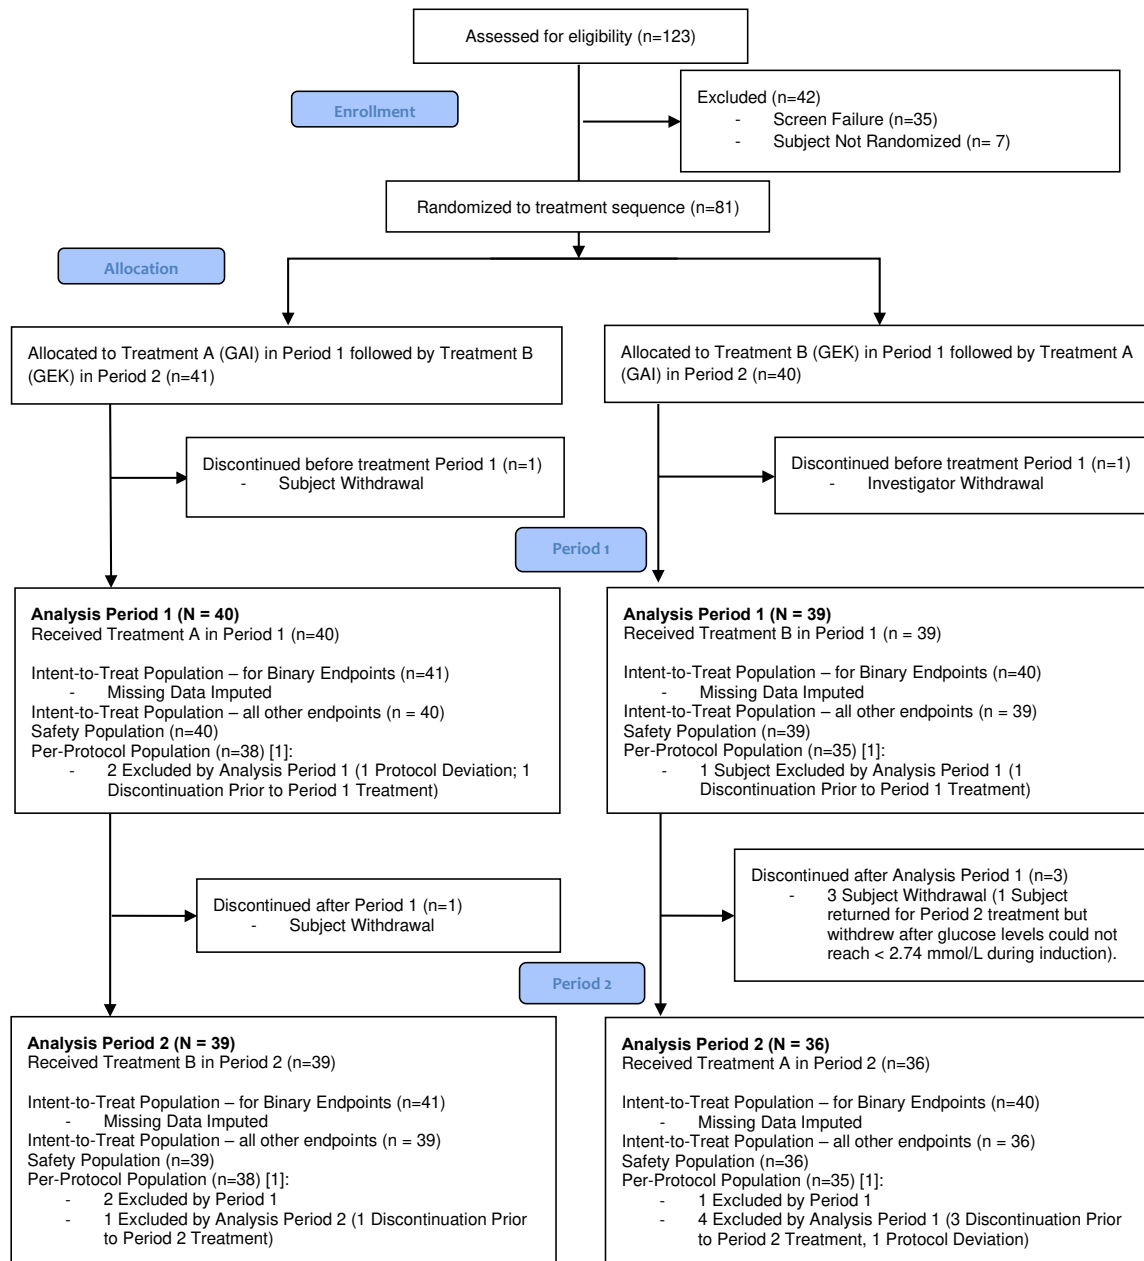

GAI = Glucagon Auto-Injector

GEK = Glucagon Emergency Kit

[1] Per Protocol Analysis Population includes subjects who received both study drugs per treatment sequence and no major protocol deviations.

Supplement Figure 4. Mean plasma glucose levels over time (A); time to resolution of neuroglycopenic symptoms (B); and mean (SD) total symptom score, neuroglycopenic score, and autonomic symptom score (C) after Glucagon Auto-Injector (GAI) and Glucagon Emergency Kit (GEK) in XSGP-301.

A

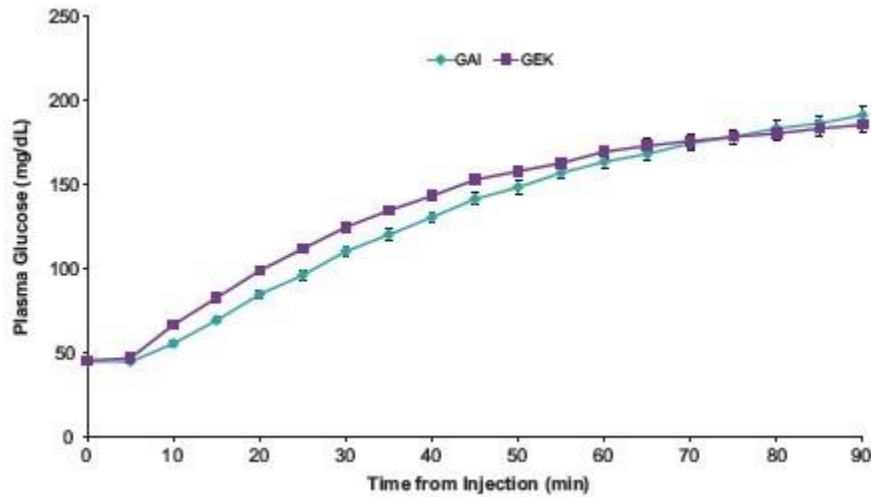

B

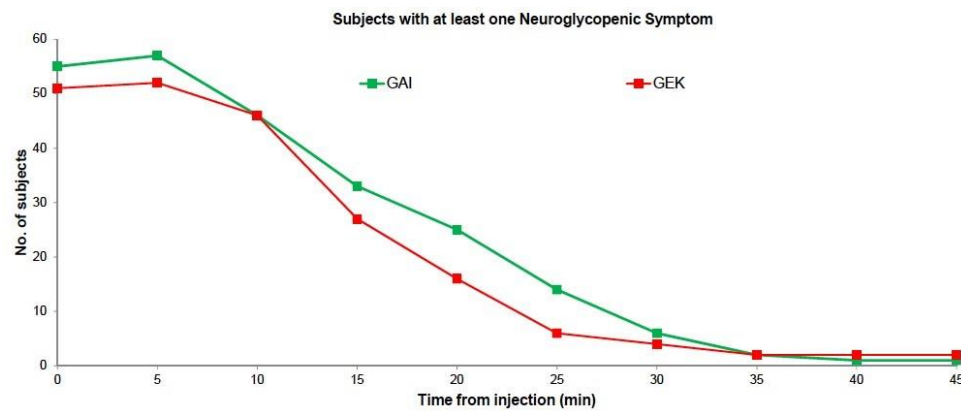

C

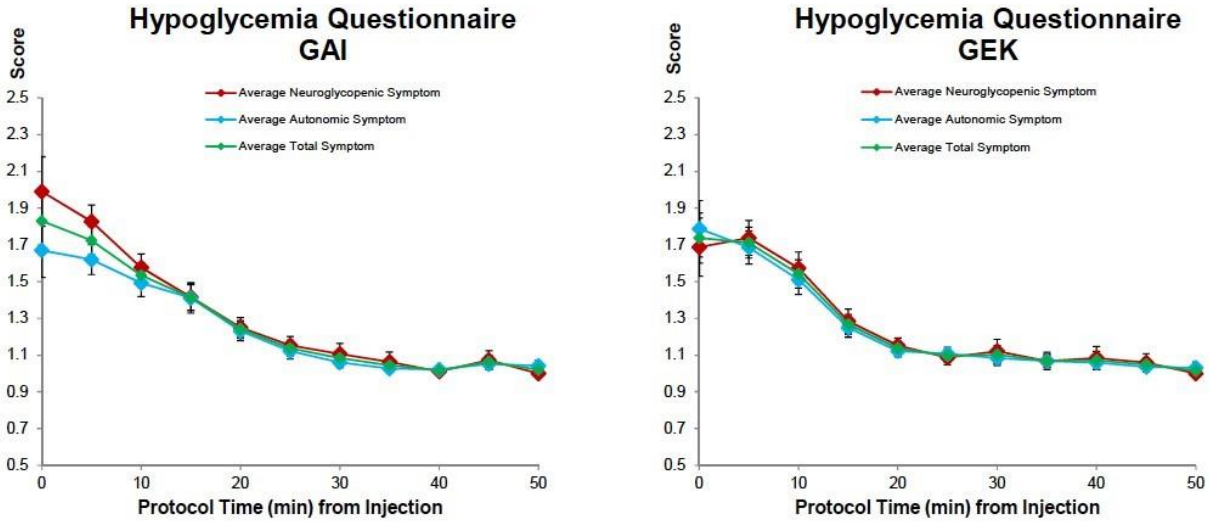

Supplemental Figure 5. Mean (standard deviation) plasma glucose concentrations with GAI by ethnicity and race for the first 12 subjects in each population, which included: non-Hispanic Whites (n=12), Hispanic Whites (n=4), African-Americans (n=4), and other (n=3) had plasma glucose concentrations obtained to evaluated glucose PK.

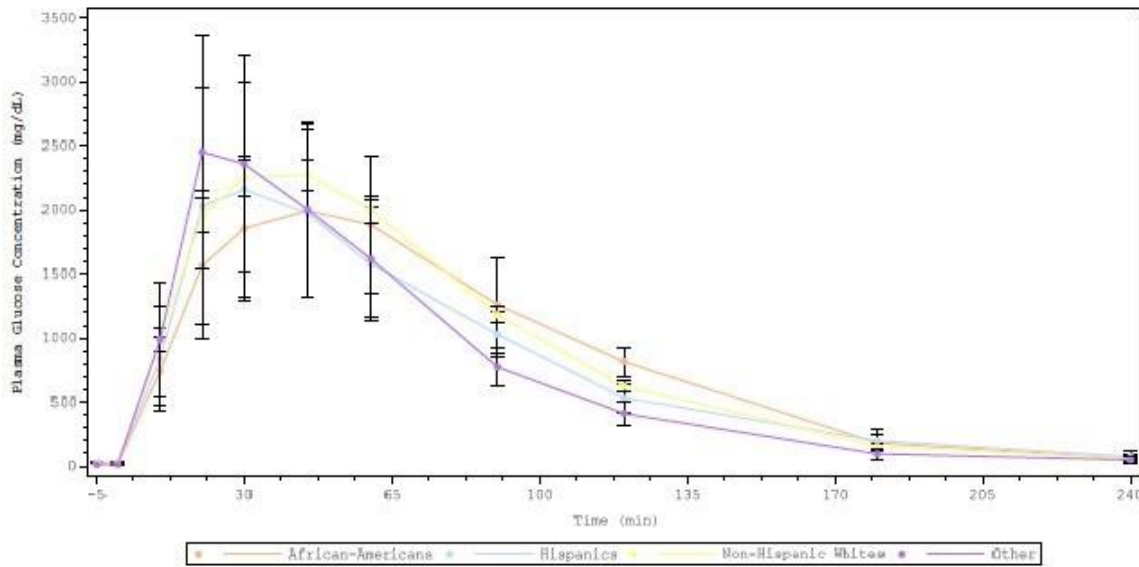

Supplement: bmjdrc-2021-002137supp001.pdf [file bmjdrc-2021-002137supp001.pdf]
